# Supplementary material for: Three-Dimensional Arrangement of Human Bone Marrow Microvessels Revealed by Immunohistology in Undecalcified Sections
Source: PLoS One. 2016 Dec 20;11(12):e0168173. doi: 10.1371/journal.pone.0168173 (PMC5172587; doi:10.1371/journal.pone.0168173)
Supplement: S2 Table — (XLS) [file pone.0168173.s005.xls]

## Sheet: Sheet1
S2 Table. Hausdorff distances from second mesh (with cut surfaces) to first mesh
Region	Number of samples	min distance, µm	max distance, µm	average distance, µm	RMS, µm	Diagonal, µm	max distance, %	average distance, %	RMS, %
R1	1093827	0	11.32	0.5542	0.7444	1416.49	0.799161	0.039125	0.0525526
R2	553060	0	10.4	0.4232	0.6508	1391.36	0.747469	0.0304162	0.0467743
R3	839635	0	13.08	0.6483	0.8501	1391.54	0.939966	0.0465887	0.0610906
R4	1019446	0	7.942	0.4453	0.6673	1391.59	0.570713	0.0319993	0.0479523
